# Supplementary material
Source: PubMed Central journal article supplement (PMC4801710)
Supplement: NIHMS758040-supplement.pdf [file NIHMS758040-supplement.pdf]

**Ponce, Genecin, Perez and Livingstone (2016) – SCHEMATICS** (for code, please see Repository at <https://github.com/crponce/chairTraining.git> )

How we put together our Arduino portable system:

1. We first programmed the Arduino and confirmed that all sensors behaved as expected.
2. We made holes in our monkey chairs to fit the sensors.
3. We built a portable rig using 80/20 Erector set (<https://www.8020.net/>)
4. We assembled the reward circuit and made sure that water flowed at our preferred levels.

Arduino Uno

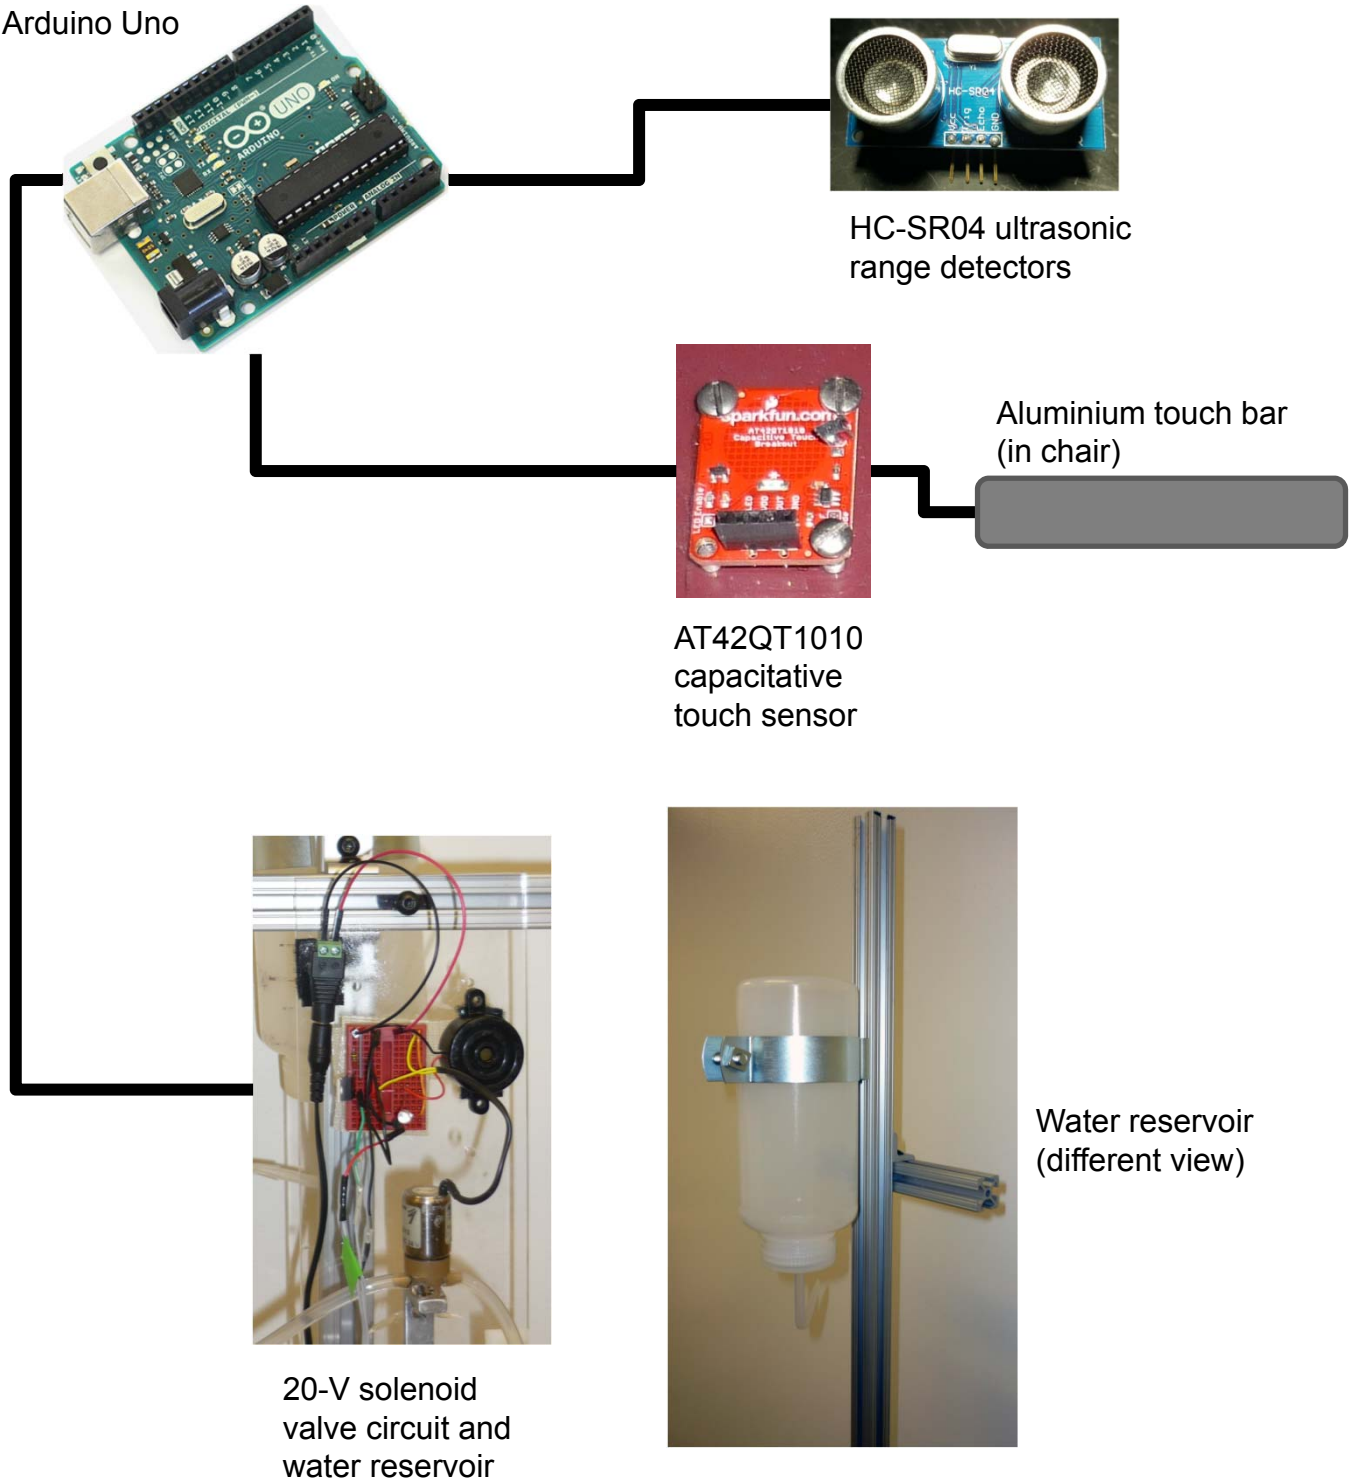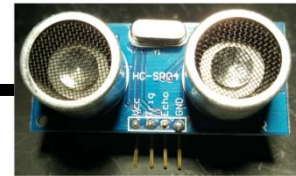

HC-SR04 ultrasonic range detectors

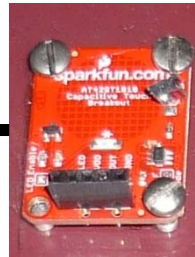

AT42QT1010 capacitive touch sensor

Aluminium touch bar (in chair)

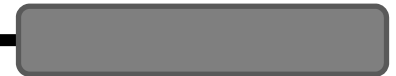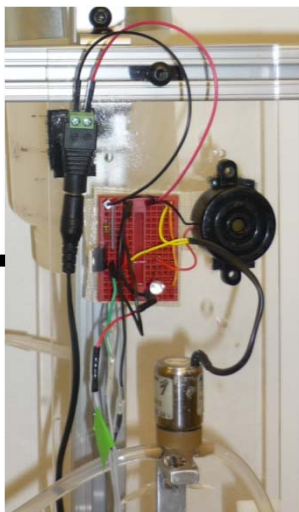

20-V solenoid valve circuit and water reservoir

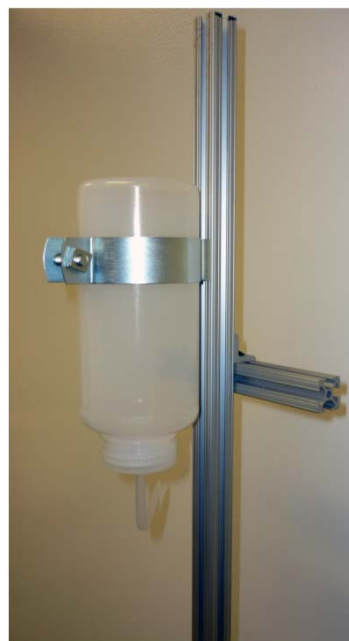

Water reservoir (different view)

- 1. Arduino and sensors.** After downloading the Arduino program, practice using sample scripts (File→Scripts). We started with “Blink,” copied below. Feel free to review our code (included in this Github repository).

```
/*  
Blink  
Turns on an LED on for one second, then off for one second, repeatedly.
```

Most Arduinos have an on-board LED you can control. On the Uno and Leonardo, it is attached to digital pin 13. If you're unsure what pin the on-board LED is connected to on your Arduino model, check the documentation at <http://arduino.cc>

This example code is in the public domain.

```
modified 8 May 2014  
by Scott Fitzgerald  
*/
```

```
// the setup function runs once when you press reset or power the board  
void setup() {  
  // initialize digital pin 13 as an output.  
  pinMode(13, OUTPUT);  
}
```

```
// the loop function runs over and over again forever  
void loop() {  
  digitalWrite(13, HIGH); // turn the LED on (HIGH is the voltage level)  
  delay(1000);           // wait for a second  
  digitalWrite(13, LOW); // turn the LED off by making the voltage LOW  
  delay(1000);           // wait for a second  
}
```

## 2. Prepare the chair for the sensors.

Touch bar in acrylic base:  
can be fixed to cage or chair

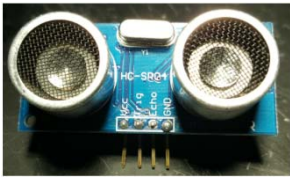

HC-SR04 ultrasonic range detectors

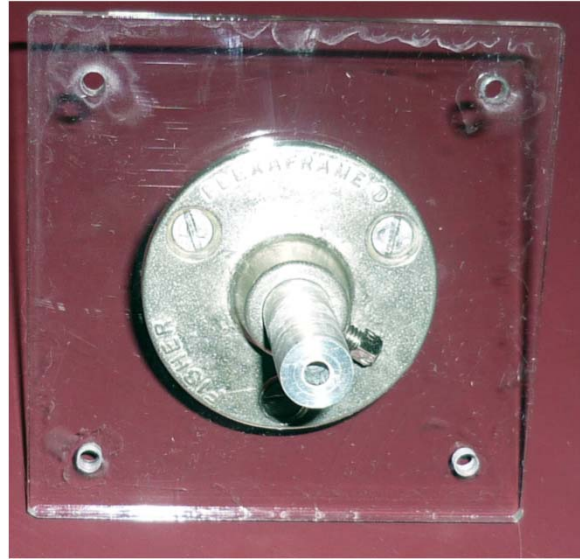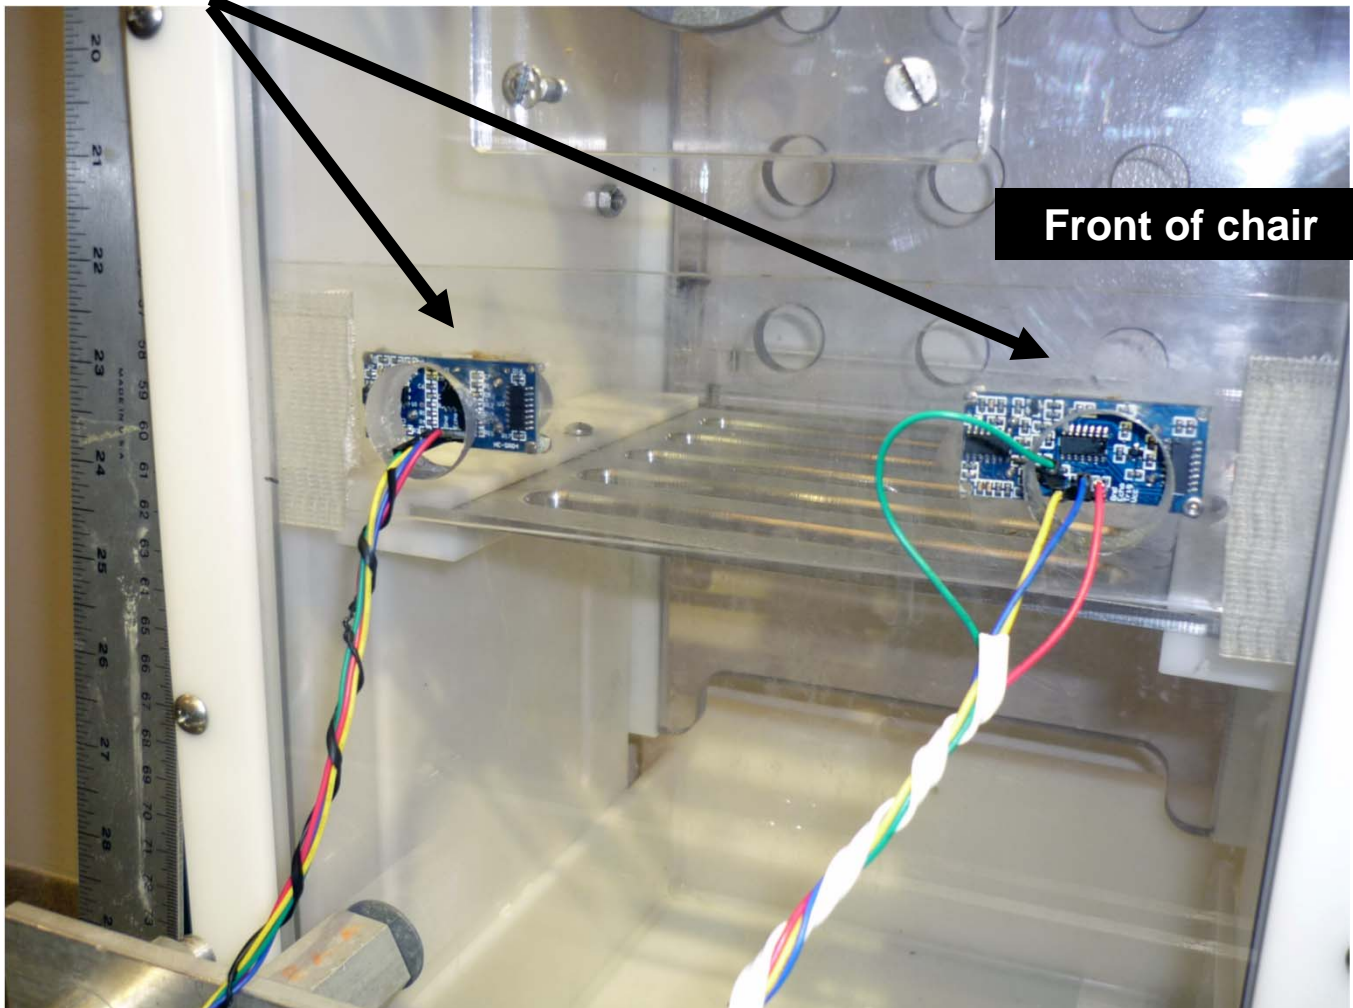

Chair with lixit, touch bar and proximity sensors in place

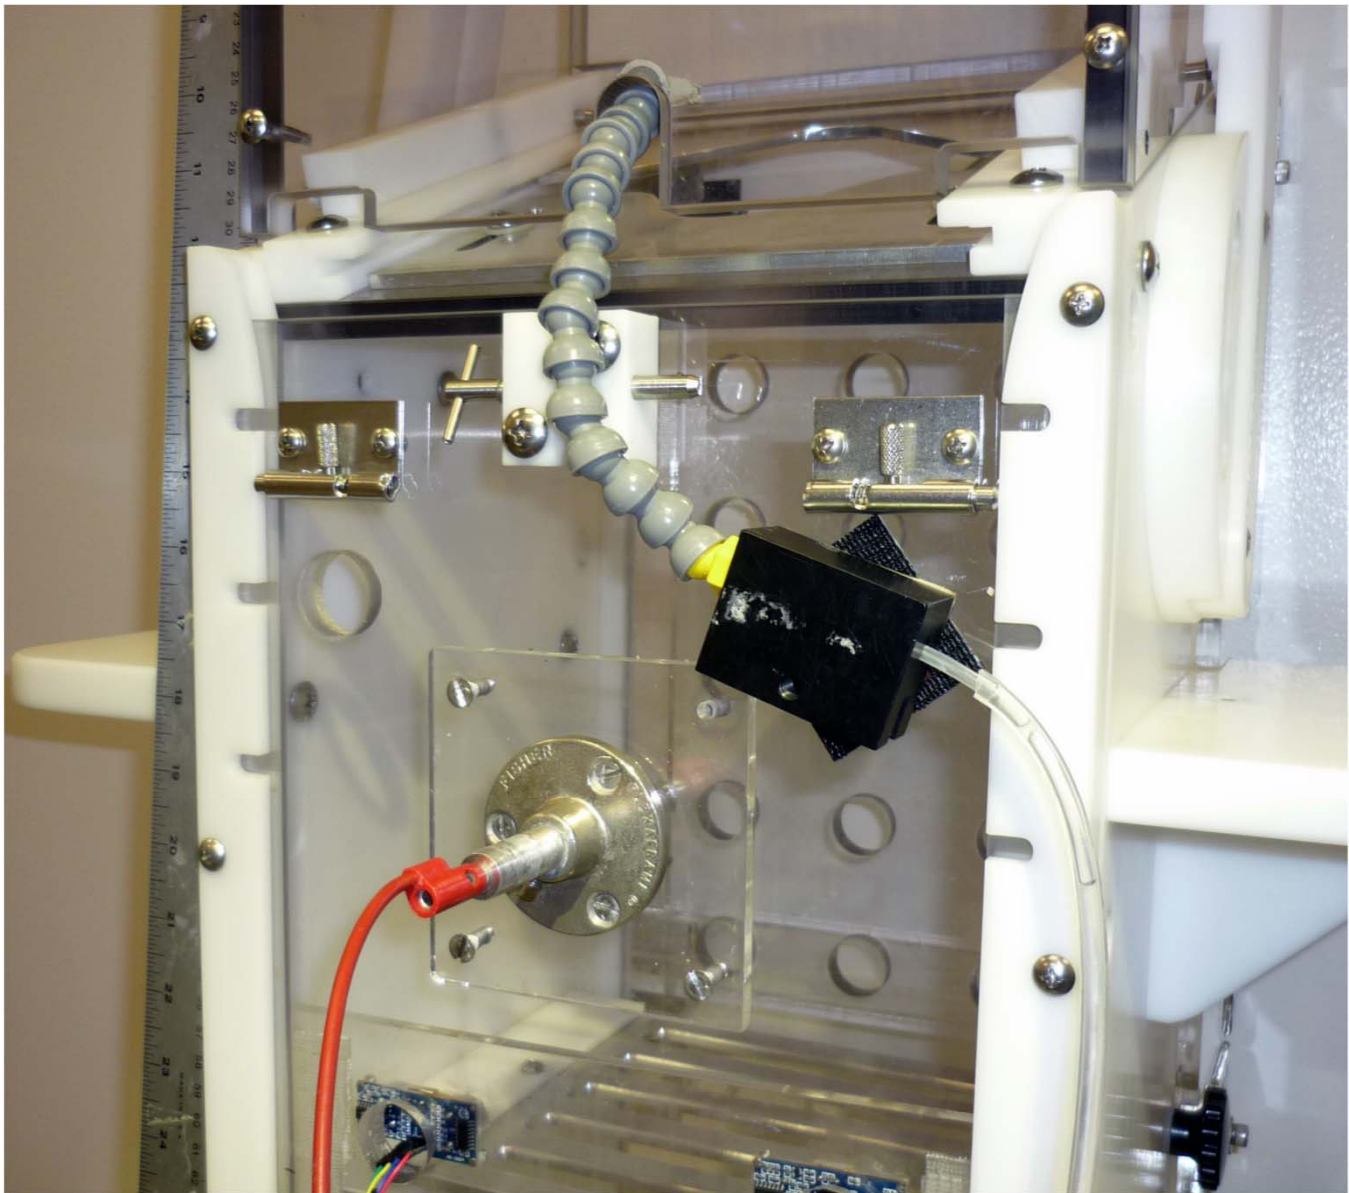

**3. Portable rig.** We used 80/20 erector set parts to put together a portable rig (<https://www.8020.net/>). This can be used to hold the water bottle, reward circuit, laptop and camera. The design is guided by personal preferences.

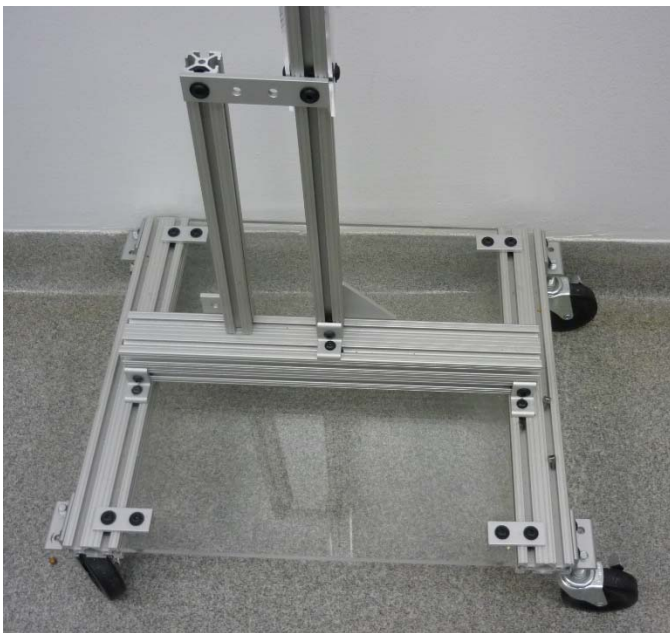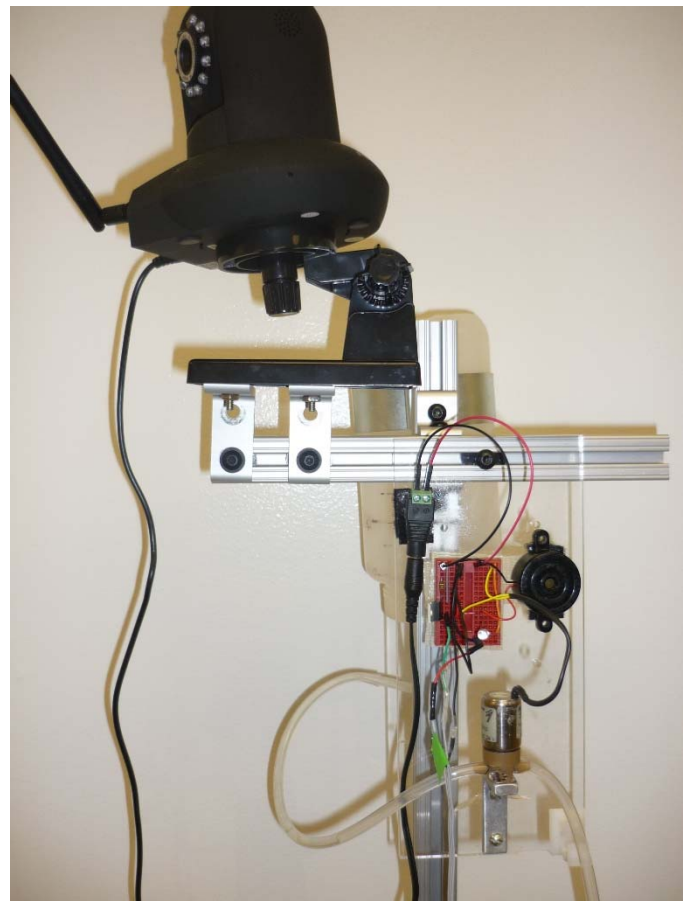

**3. Reward circuit.** The Arduino and its sensors can be powered by a 5-V source, but the solenoid valve requires a higher voltage (24-V). Thus we built a peripheral circuit that could be activated by the Arduino reward signal pin. The circuit used a MOSFET gate, which conducted current through the solenoid when its 5-V gate was activated by the Arduino output.

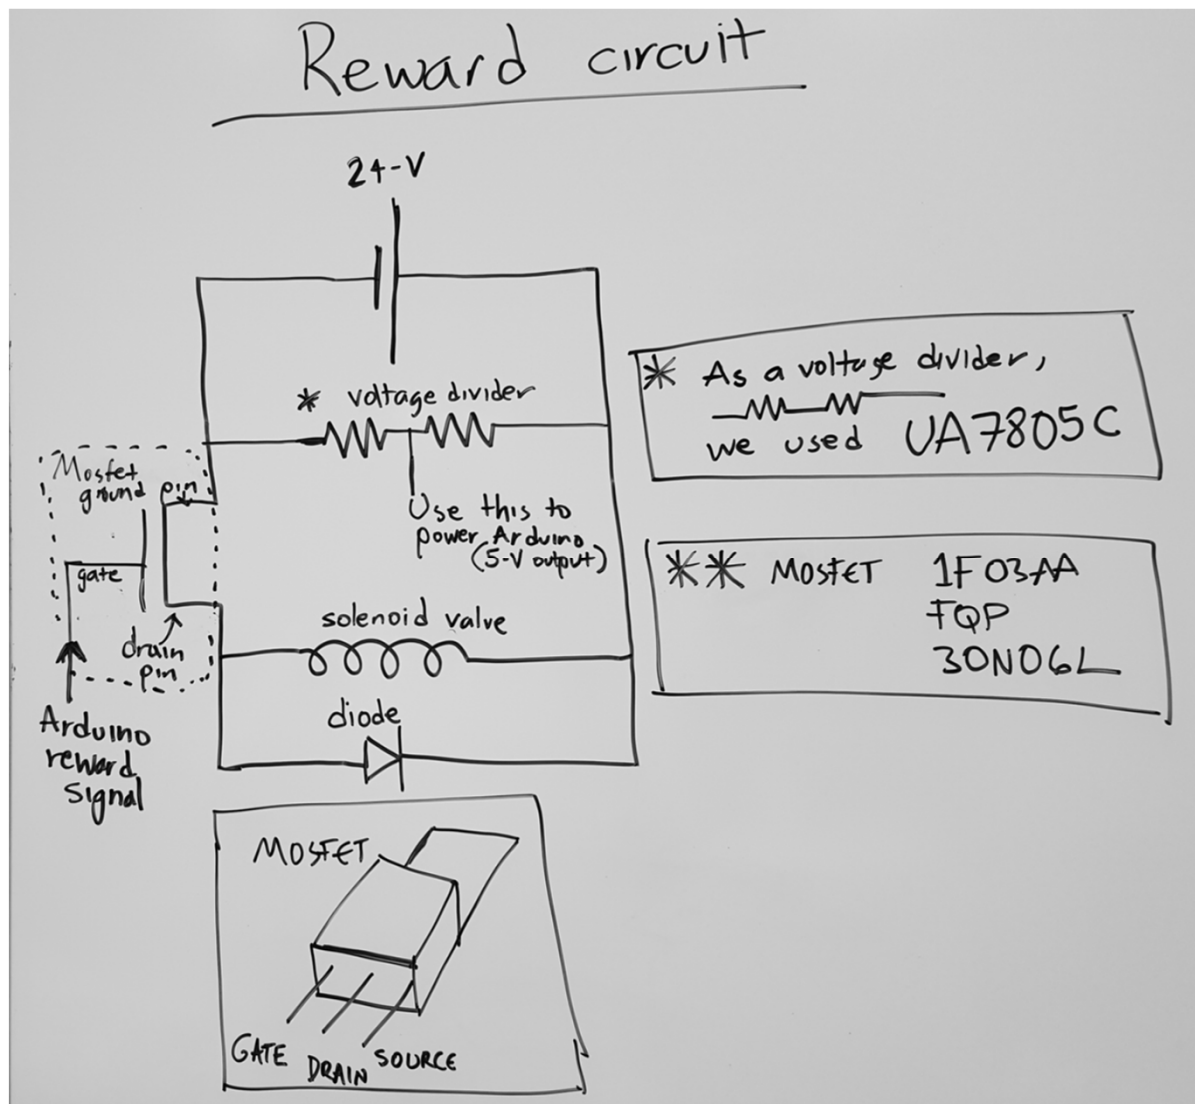

**24-V power input**

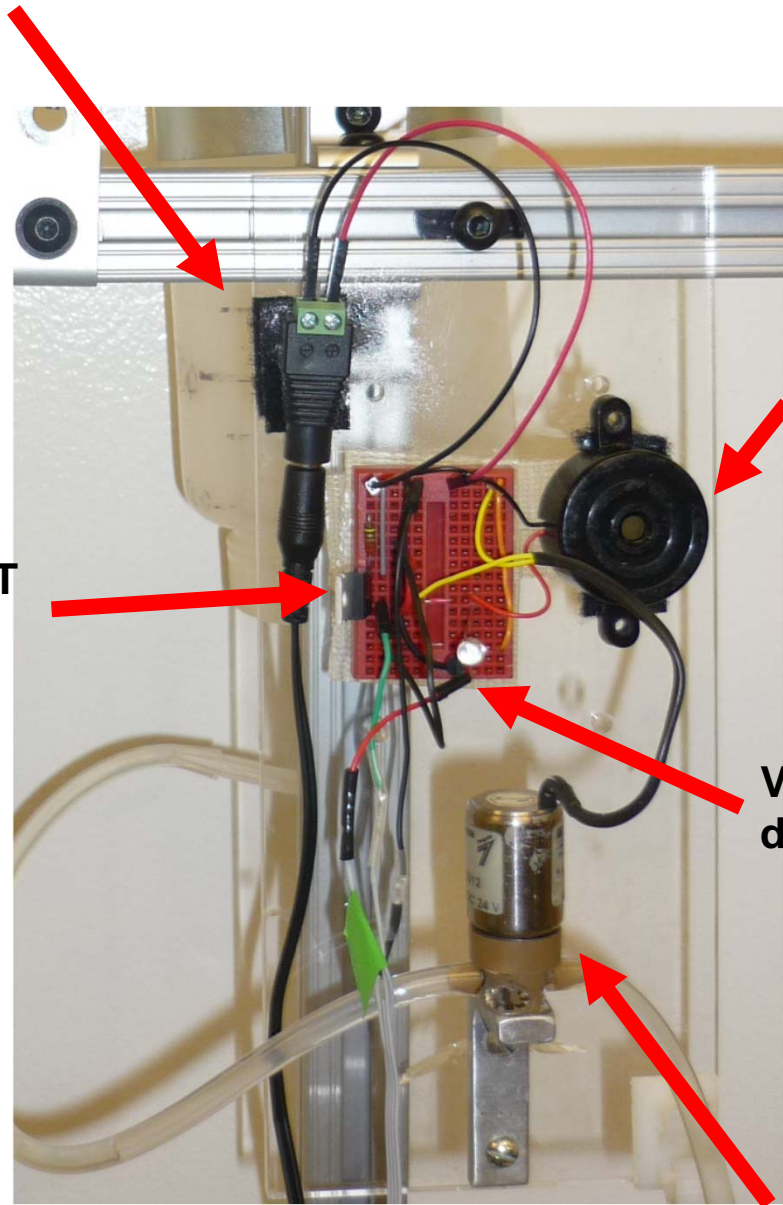

**Reward  
buzzer**

**MOSFET  
(gate)**

**Voltage  
divider**

**Solenoid/valve**

## Final setup

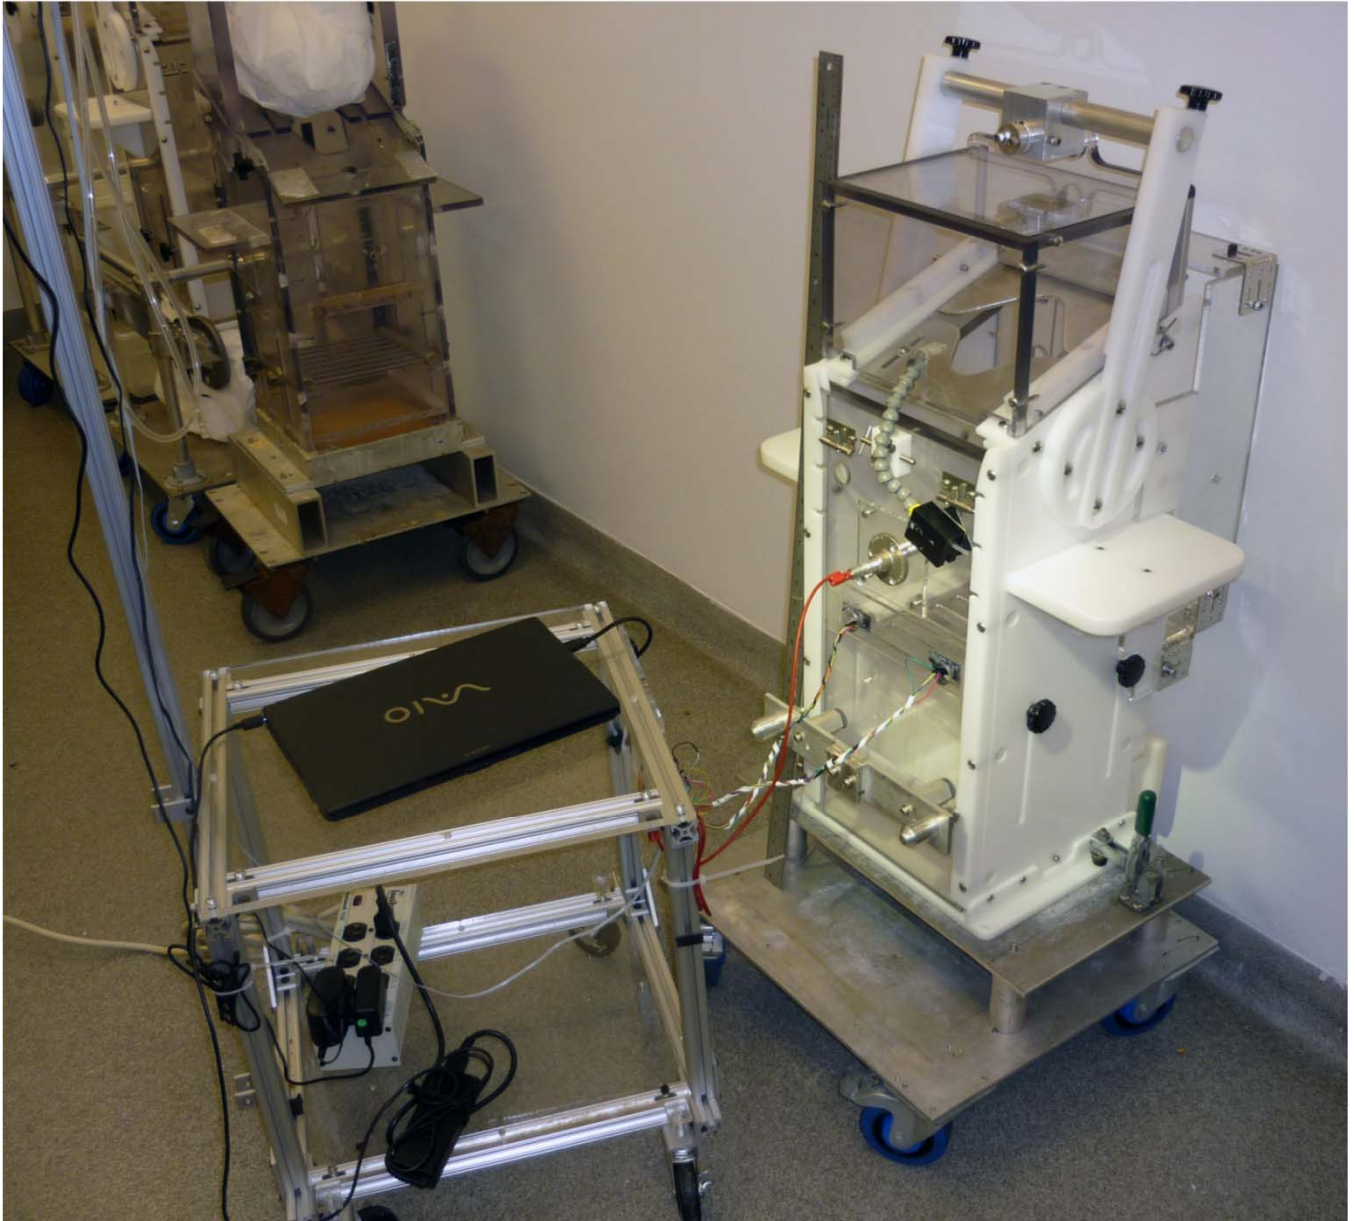



## Starter kit

| <b>Electronics</b>                                                                         |                                                                         | <b>Approximate cost per unit (USD)</b> |
|--------------------------------------------------------------------------------------------|-------------------------------------------------------------------------|----------------------------------------|
| Arduino Uno                                                                                | <a href="http://store-usa.arduino.cc/">http://store-usa.arduino.cc/</a> | 30                                     |
| Capacitive touch sensor (AT42QT1010)                                                       | <a href="http://www.sparkfun.com">www.sparkfun.com</a>                  | 5-10                                   |
| Ultrasonic range detectors (HC-SR04)                                                       | <a href="http://www.sunfounder.com">www.sunfounder.com</a>              | 5-10                                   |
| Breadboards, jumpers                                                                       | <a href="http://www.sparkfun.com">www.sparkfun.com</a>                  |                                        |
| Microtivity IL611 5mm Diffused RGB Controllable LED, Common Cathode (Pack of 12)           | <a href="http://www.amazon.com">www.amazon.com</a>                      | 6                                      |
| SYB-170 Color Board Mini Small Bread Board                                                 | <a href="http://www.amazon.com">www.amazon.com</a>                      | 9                                      |
| Power Adapter for Arduino AC to DC 9V                                                      | <a href="http://www.amazon.com">www.amazon.com</a>                      | 6                                      |
| Microtivity IB400 400-point Experiment Breadboard                                          | <a href="http://www.amazon.com">www.amazon.com</a>                      | 5                                      |
| Solderless Flexible Breadboard Jumper Wires                                                | <a href="http://www.amazon.com">www.amazon.com</a>                      | 7                                      |
| <b>Portable rig</b>                                                                        |                                                                         |                                        |
| Aluminum T-Slotted Framing Extrusion, Single Profile, 1" Size, Solid                       | <a href="http://www.mcmaster.com/">http://www.mcmaster.com/</a>         | 32                                     |
| Reusable Nylon Cable Tie Squeeze Release, 8" Long, 2" Max Bundle Dia, Black                | <a href="http://www.mcmaster.com/">http://www.mcmaster.com/</a>         | 7                                      |
| Clamping Hanger Galvanized STL W/Bolt & Nut, 3-1/2" ID, 160 lb Cap.                        | <a href="http://www.mcmaster.com/">http://www.mcmaster.com/</a>         | 8                                      |
| Threaded-Stem Swivel Caster W/Brake, 3/8"-16 Stem, 3" X 13/16" Rubber Whl, 125#Cap         | <a href="http://www.mcmaster.com/">http://www.mcmaster.com/</a>         | 11                                     |
| Aluminum T-Slotted Framing Extrusion 90 Degree Bracket                                     | <a href="http://www.mcmaster.com/">http://www.mcmaster.com/</a>         | 4                                      |
| Aluminum T-Slotted Framing Extrusion 90 Degree Plate                                       | <a href="http://www.mcmaster.com/">http://www.mcmaster.com/</a>         | 7                                      |
| Compact End-Feed Fastener, 1/4"-20 Thread for Aluminum T-Slotted Framing Extrusion         | <a href="http://www.mcmaster.com/">http://www.mcmaster.com/</a>         | 2                                      |
| Aluminum T-Slotted Framing Extrusion 90 Degree Bracket, Sngl, 2-Hole, for 1-1/2" Extrusion | <a href="http://www.mcmaster.com/">http://www.mcmaster.com/</a>         | 4                                      |
| VWR BOTTLE RED CAP 1000ML (16650-322)                                                      | <a href="http://www.vwr.com">www.vwr.com</a>                            | 7                                      |
| Wireless IP camera (Foscam FI8910W)                                                        | <a href="http://Amazon.com">Amazon.com</a>                              | 40                                     |
| <b>Reward circuit</b>                                                                      |                                                                         |                                        |
| Two-way solenoid valve (3-111-900, VAC 50PSIG)                                             | <a href="http://www.parker.com">www.parker.com</a>                      | 10                                     |
| Voltage regulator (497-15681-5-ND)                                                         | <a href="http://www.digikey.com">www.digikey.com</a>                    | 0.6                                    |
| Gate (FET) transistor (FQP30N06L-ND)                                                       | <a href="http://www.digikey.com">www.digikey.com</a>                    | 1                                      |
| AC/DC mount adapter 24-V (T1073-P5P-ND)                                                    | <a href="http://www.digikey.com">www.digikey.com</a>                    | 14                                     |
